# Supplementary material for: Evaluating effects of iron on manganese toxicity in soybean and sunflower using synchrotron-based X-ray fluorescence microscopy and X-ray absorption spectroscopy
Source: Royal Society of Chemistry journal article supplement (doi:10.1039/c9mt00219g), 2019-01-01
Supplement: c9mt00219g1.pdf [file c9mt00219g1.pdf]

**Electronic Supplementary Information (ESI) for Metallomics.**

**Evaluating effects of iron on manganese toxicity in soybean and sunflower using synchrotron-based X-ray fluorescence microscopy and X-ray absorption spectroscopy**

F. Pax C. Blamey,<sup>a</sup> Cui Li,<sup>‡a</sup> Daryl L. Howard,<sup>b</sup> Miaomiao Cheng,<sup>§c</sup> Caixian Tang,<sup>c</sup> Kirk G. Scheckel,<sup>d</sup> Matt R. Noerpel,<sup>d</sup> Peng Wang,<sup>e</sup> Neal W. Menzies,<sup>a</sup> Peter M. Kopittke,<sup>\*a</sup>

*<sup>a</sup>School of Agriculture and Food Sciences, The University of Queensland, St Lucia, Queensland 4072, Australia. Email: p.kopittke@uq.edu.au; Fax +61-7-33651177; Tel: +61-7-33469149*

*<sup>b</sup>Australian Synchrotron, ANSTO, Clayton, Victoria 3168, Australia*

*<sup>c</sup>Centre for AgriBioscience, La Trobe University, Bundoora, Victoria 3086, Australia*

*<sup>d</sup>National Risk Management Research Laboratory, Environmental Protection Agency, Cincinnati, Ohio 45224, U.S.A.*

*<sup>e</sup>College of Resources and Environmental Sciences, Nanjing Agricultural University, Nanjing 210095, People's Republic of China*

† Electronic supplementary information (ESI) available. See DOI:

‡ Present address: Northwestern Polytechnical University, Xi'an, Shaanxi, People's Republic of China

§ Present address: Murdoch University, Perth, Western Australia 6150, Australia

## Supplementary Information

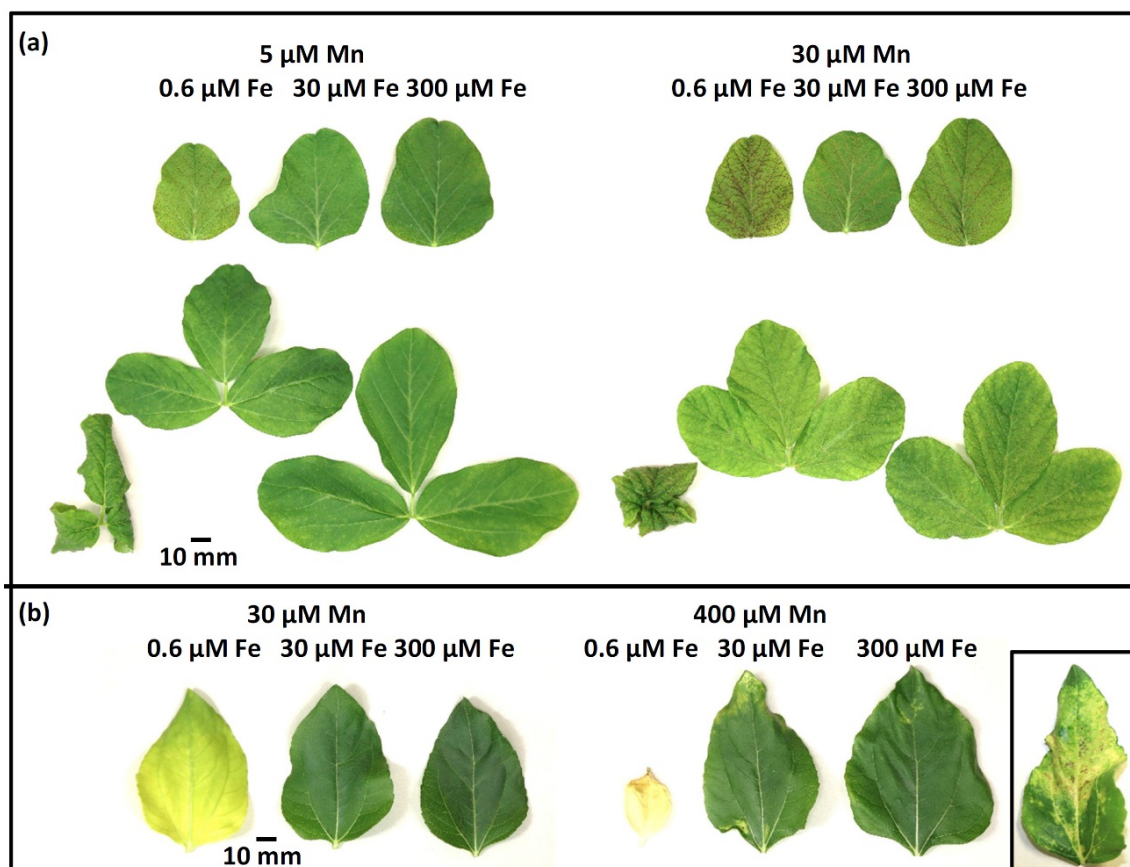

**Supplementary Fig. S1** Visible effects of Mn and Fe in solution on soybean and sunflower leaves. (a) Unifoliate and trifoliate leaves of soybean grown for 1 week at 5 and 30  $\mu\text{M}$  Mn with 0.6, 30, and 300  $\mu\text{M}$  Fe (Experiment 2). (b) Lower alternate leaves of sunflower grown at 30 and 400  $\mu\text{M}$  Mn with 0.6, 30, and 300  $\mu\text{M}$  Fe. Insert: Unpublished image from the study of Blamey et al. (2018a) showing the chlorosis and distortion of a lower alternate leaf of sunflower grown at 400  $\mu\text{M}$  Mn and 6  $\mu\text{M}$  Fe.

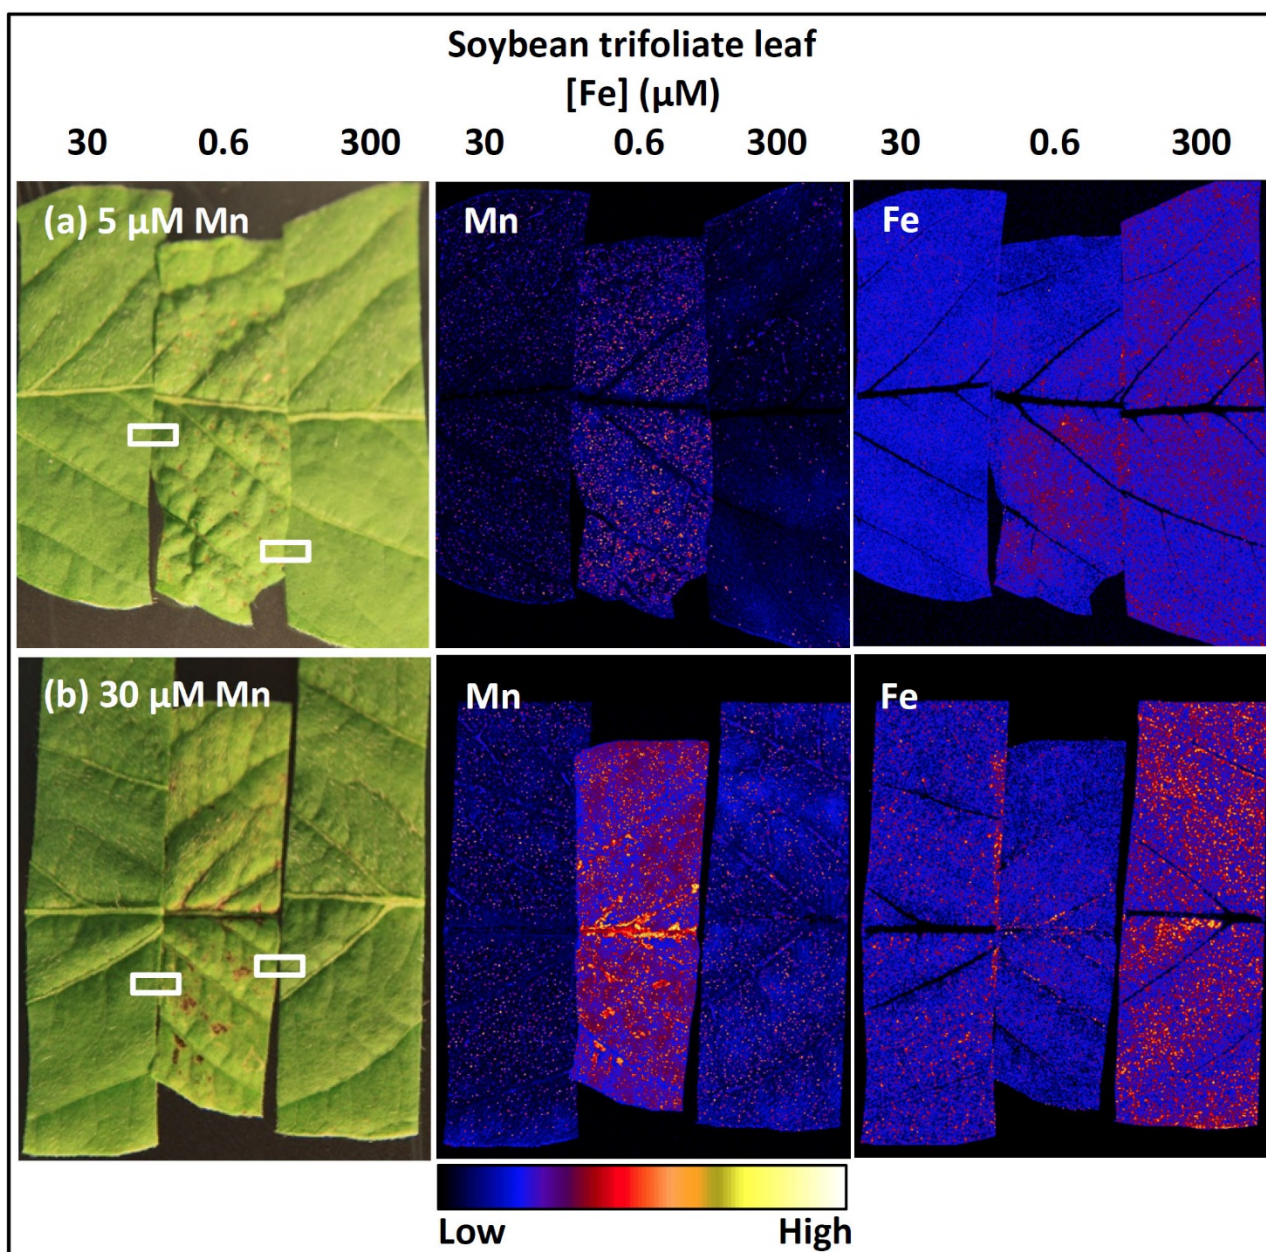

**Supplementary Fig. S2** Optical images and  $\mu$ -XRF survey scans of Mn and Fe distributions in trifoliolate leaf sections of soybean grown for 1 week in solutions with (a) 5 and (b) 30  $\mu\text{M}$  Mn and with 30, 0.6, and 300  $\mu\text{M}$  Fe in solution (Experiment 2). The white boxes in the optical images indicate the locations of the 3.05 mm  $\times$  1.00 mm  $\mu$ -XRF detailed scans and the color scale in (b) applies to all Mn and Fe distributions.

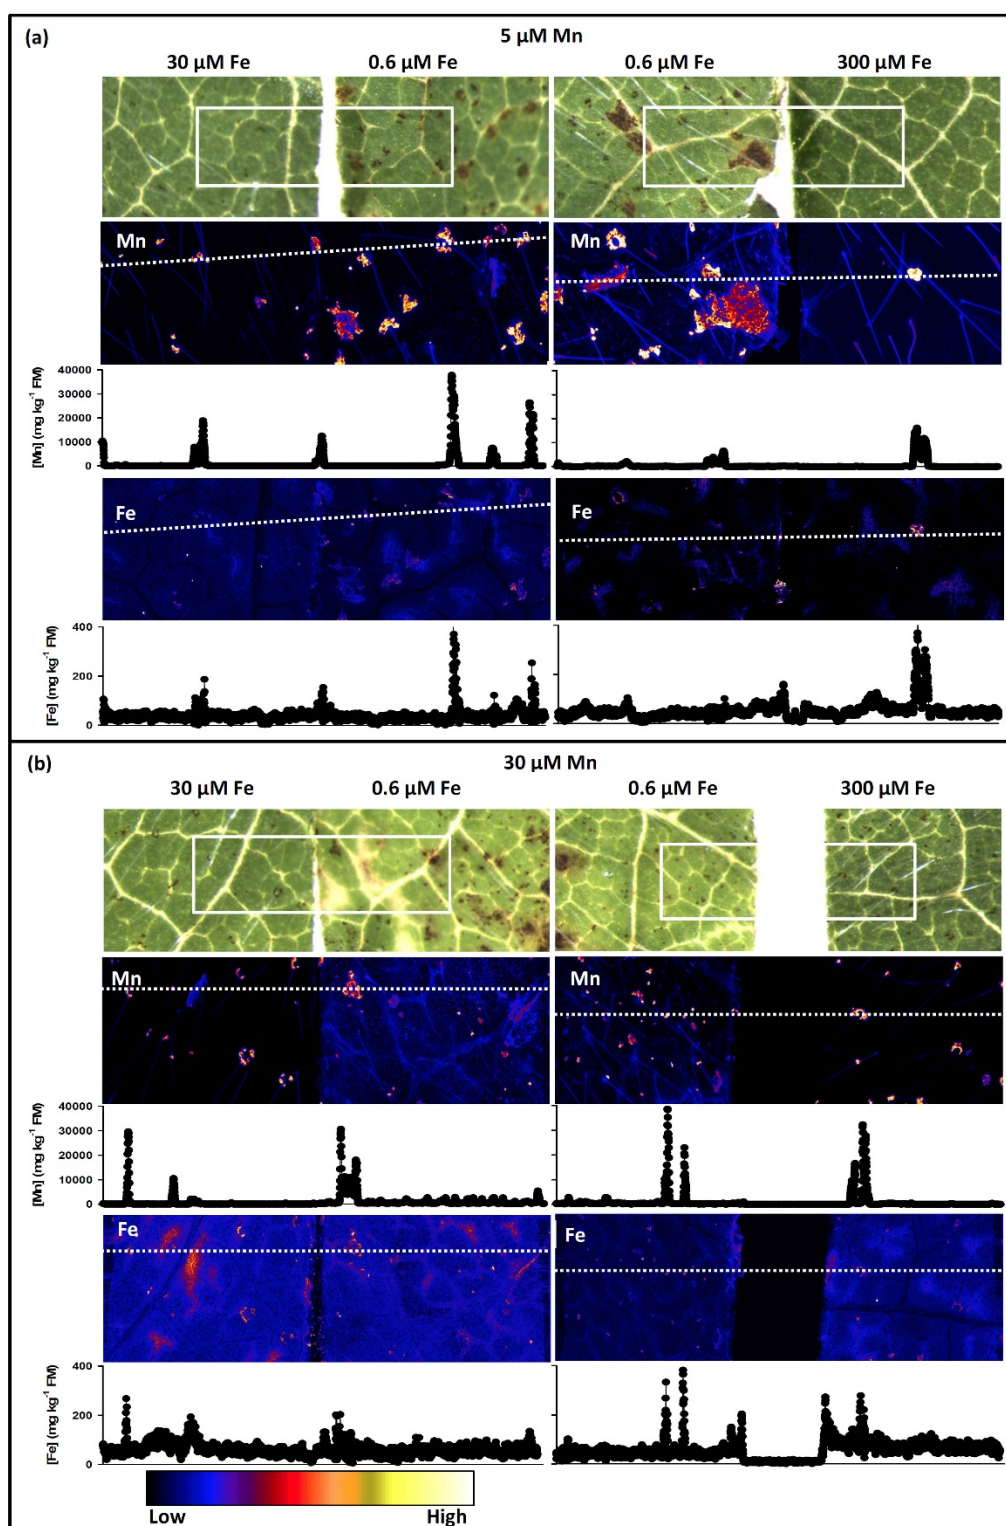

**Supplementary Fig. S3** Optical images and  $\mu$ -XRF detailed scans ( $3.05 \text{ mm} \times 1.00 \text{ mm}$ ) of Mn and Fe distributions in trifoliolate leaf sections of soybean grown at (a) 5 and (b) 30  $\mu\text{M}$  Mn with 30, 0.6, and 300  $\mu\text{M}$  Fe in solution (Experiment 2). The dotted white lines indicate transects along which the Mn and Fe concentrations were determined. Valid comparisons may be made between Fe treatments within each image. The color scale in (b) applies to all Mn and Fe  $\mu$ -XRF scans.

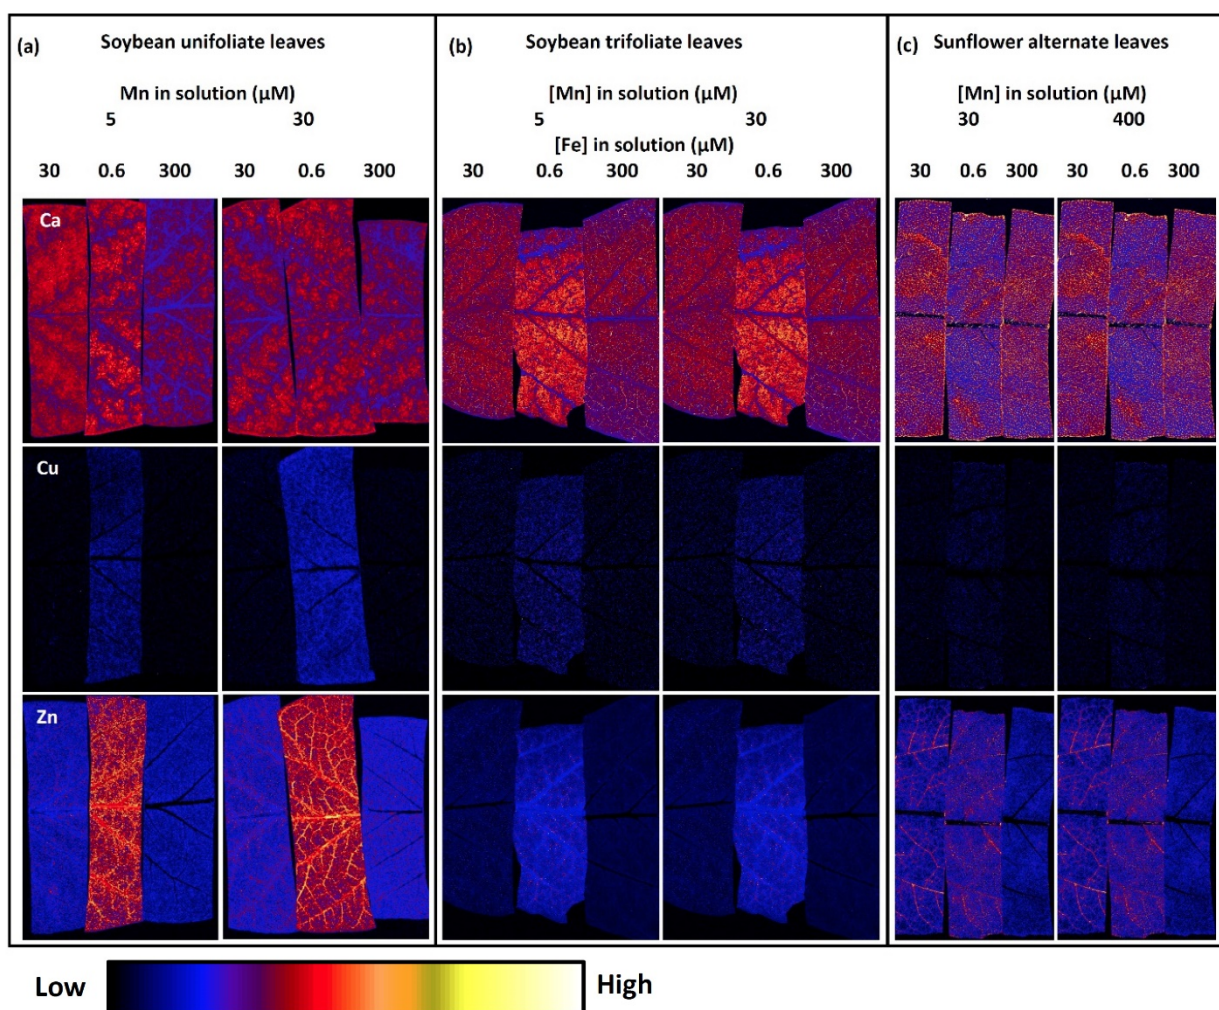

**Supplementary Fig. S4**  $\mu$ -XRF survey scans of Ca, Cu, and Zn distributions and concentrations in sections of (a) soybean unifoliate leaves, (b) soybean trifoliate leaves, and (c) sunflower lower alternate leaves after 1 week's growth in complete nutrient solutions with two Mn treatments and three Fe treatments (Experiment 2). The color scale applies to all images.

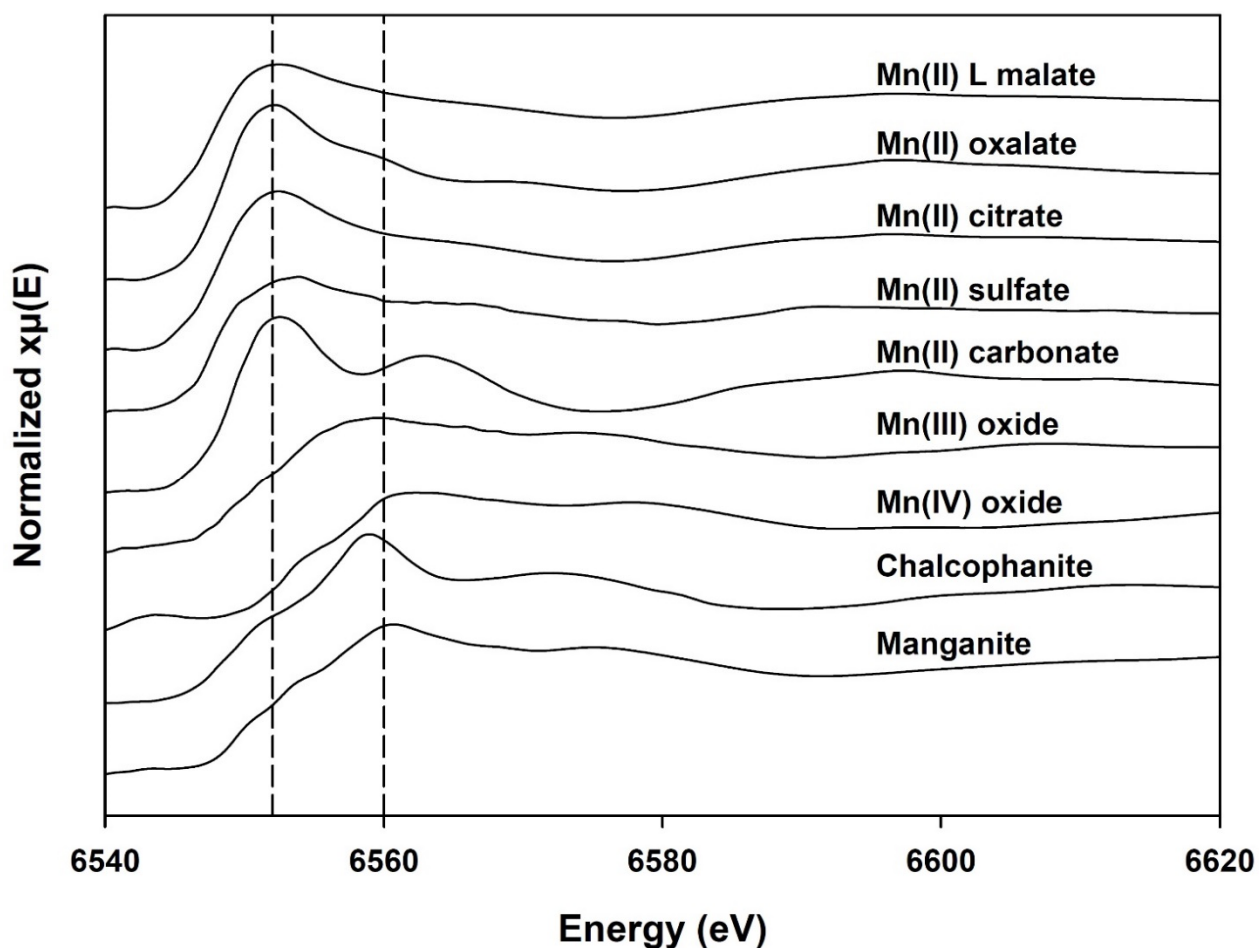

**Supplementary Fig. S5** Normalized K-edge XANES spectra of nine Mn compounds showing differences over the range from 6540 to 6620 eV. The vertical dashed lines correspond approximately to the white-line peak of Mn(II) at 6,552 eV and that of Mn(III) and Mn(IV) at 6,560 eV.

**Supplementary Table S1** Main effects and interactions of Mn and Fe in solution on concentrations of nine selected nutrients in soybean unifoliolate leaves on a dry mass (DM) basis. A value of 19.5 % DM may be used to convert concentrations to a fresh mass basis. (Experiment 1)

| [Mn] in unifoliolate leaves (mg kg <sup>-1</sup> )<br>Mn** Fe** Mn×Fe**   |          | [Mn] in solution (μM) |             |             | Fe means    |
|---------------------------------------------------------------------------|----------|-----------------------|-------------|-------------|-------------|
| [Fe] in solution (μM)                                                     | 0.6      | 0.5                   | 5           | 30          |             |
|                                                                           | 30       | 220 ± 30              | 850 ± 140   | 3480 ± 240  | 2010 ± 330  |
|                                                                           | 300      | 240 ± 40              | 220 ± 10    | 820 ± 40    | 520 ± 70    |
|                                                                           | Mn means | 280 ± 40              | 220 ± 10    | 800 ± 40    | 530 ± 60    |
| [Fe] in unifoliolate leaves (mg kg <sup>-1</sup> )<br>Mn** Fe** Mn×Fe**   |          | [Mn] in solution (μM) |             |             | Fe means    |
| [Fe] in solution (μM)                                                     | 0.6      | 0.5                   | 5           | 30          |             |
|                                                                           | 30       | 250 ± 20              | 430 ± 90    | 1700 ± 230  | 1020 ± 140  |
|                                                                           | 300      | 90 ± 10               | 100 ± 10    | 50 ± 0      | 70 ± 10     |
|                                                                           | Mn means | 1260 ± 200            | 150 ± 20    | 360 ± 70    | 530 ± 10    |
| [Cu] in unifoliolate leaves (mg kg <sup>-1</sup> )<br>Mn** Fe** Mn×Fe NS  |          | [Mn] in solution (μM) |             |             | Fe means    |
| [Fe] in solution (μM)                                                     | 0.6      | 0.5                   | 5           | 30          |             |
|                                                                           | 30       | 25.0 ± 3.9            | 20.5 ± 2.8  | 29.2 ± 2.2  | 26.0 ± 1.7  |
|                                                                           | 300      | 11.7 ± 1.3            | 6.2 ± 0.2   | 10.9 ± 1.1  | 9.9 ± 0.8   |
|                                                                           | Mn means | 14.0 ± 0.9            | 7.3 ± 0.7   | 9.2 ± 0.6   | 9.9 ± 0.7   |
| [Zn] in unifoliolate leaves (mg kg <sup>-1</sup> )<br>Mn NS Fe** Mn×Fe NS |          | [Mn] in solution (μM) |             |             | Fe means    |
| [Fe] in solution (μM)                                                     | 0.6      | 0.5                   | 5           | 30          |             |
|                                                                           | 30       | 350 ± 40              | 400 ± 70    | 420 ± 20    | 390 ± 20    |
|                                                                           | 300      | 170 ± 20              | 90 ± 10     | 160 ± 20    | 150 ± 10    |
|                                                                           | Mn means | 200 ± 20              | 80 ± 10     | 140 ± 20    | 140 ± 10    |
| [Ca] in unifoliolate leaves (%)<br>Mn NS Fe NS Mn×Fe NS                   |          | [Mn] in solution (μM) |             |             | Fe means    |
| [Fe] in solution (μM)                                                     | 0.6      | 0.5                   | 5           | 30          |             |
|                                                                           | 30       | 3.14 ± 0.21           | 3.13 ± 0.11 | 3.07 ± 0.17 | 3.10 ± 0.10 |
|                                                                           | 300      | 2.82 ± 0.11           | 3.02 ± 0.11 | 3.09 ± 0.10 | 3.01 ± 0.07 |
|                                                                           | Mn means | 2.82 ± 0.07           | 3.02 ± 0.22 | 2.70 ± 0.06 | 2.81 ± 0.07 |
| [Mg] in unifoliolate leaves (%)<br>Mn** Fe** Mn×Fe**                      |          | [Mn] in solution (μM) |             |             | Fe means    |
| [Fe] in solution (μM)                                                     | 0.6      | 0.5                   | 5           | 30          |             |
|                                                                           | 30       | 0.38 ± 0.04           | 0.42 ± 0.03 | 0.48 ± 0.03 | 0.44 ± 0.02 |
|                                                                           | 300      | 0.40 ± 0.04           | 0.27 ± 0.02 | 0.34 ± 0.02 | 0.33 ± 0.02 |
|                                                                           | Mn means | 0.43 ± 0.03           | 0.31 ± 0.01 | 0.34 ± 0.02 | 0.36 ± 0.01 |
| [K] in unifoliolate leaves (%)<br>Mn* Fe NS Mn×Fe*                        |          | [Mn] in solution (μM) |             |             | Fe means    |
| [Fe] in solution (μM)                                                     | 0.6      | 0.5                   | 5           | 30          |             |
|                                                                           | 30       | 1.98 ± 0.17           | 1.69 ± 0.08 | 1.64 ± 0.09 | 1.74 ± 0.07 |
|                                                                           | 300      | 1.99 ± 0.12           | 1.43 ± 0.06 | 1.99 ± 0.07 | 1.85 ± 0.07 |
|                                                                           | Mn means | 1.85 ± 0.13           | 1.92 ± 0.14 | 1.89 ± 0.10 | 1.89 ± 0.07 |
| [P] in unifoliolate leaves (%)<br>Mn** Fe** Mn×Fe*                        |          | [Mn] in solution (μM) |             |             | Fe means    |
| [Fe] in solution (μM)                                                     | 0.6      | 0.5                   | 5           | 30          |             |
|                                                                           | 30       | 0.12 ± 0.01           | 0.22 ± 0.02 | 0.25 ± 0.02 | 0.21 ± 0.02 |
|                                                                           | 300      | 0.10 ± 0.01           | 0.14 ± 0.00 | 0.14 ± 0.02 | 0.13 ± 0.01 |
|                                                                           | Mn means | 0.11 ± 0.00           | 0.16 ± 0.01 | 0.13 ± 0.01 | 0.13 ± 0.01 |
| [S] in unifoliolate leaves (%)<br>Mn** Fe* Mn×Fe NS                       |          | [Mn] in solution (μM) |             |             | Fe means    |
| [Fe] in solution (μM)                                                     | 0.6      | 0.5                   | 5           | 30          |             |
|                                                                           | 30       | 0.20 ± 0.01           | 0.25 ± 0.01 | 0.23 ± 0.01 | 0.23 ± 0.01 |
|                                                                           | 300      | 0.16 ± 0.01           | 0.23 ± 0.00 | 0.22 ± 0.01 | 0.21 ± 0.01 |
|                                                                           | Mn means | 0.17 ± 0.01           | 0.24 ± 0.01 | 0.20 ± 0.01 | 0.20 ± 0.01 |
|                                                                           |          | 0.5                   | 5           | 30          | 0.21 ± 0.00 |

Values are means ± standard error

\*\*, \*, NS = significant at P ≤ 0.01, significant at P ≤ 0.05, and not significant, respectively

**Supplementary Table S2** Main effects and interactions of Mn and Fe in solution on concentrations of nine selected nutrients in soybean trifoliolate leaves on a dry mass (DM) basis. A value of 20.3 % DM may be used to convert concentrations to a fresh mass basis. (Experiment 1)

| [Mn] in trifoliolate leaves (mg kg <sup>-1</sup> )<br>Mn** Fe** Mn×Fe**  |          | [Mn] in solution (μM) |             |             | Fe means    |
|--------------------------------------------------------------------------|----------|-----------------------|-------------|-------------|-------------|
| [Fe] in solution (μM)                                                    | 0.6      | 0.5                   | 5           | 30          |             |
|                                                                          | 30       | 70 ± 10               | 580 ± 60    | 3080 ± 170  | 1700 ± 300  |
|                                                                          | 300      | 80 ± 10               | 230 ± 10    | 770 ± 50    | 460 ± 70    |
|                                                                          | Mn means | 80 ± 20               | 180 ± 10    | 810 ± 50    | 470 ± 80    |
| [Fe] in trifoliolate leaves (mg kg <sup>-1</sup> )<br>Mn** Fe** Mn×Fe**  |          | [Mn] in solution (μM) |             |             | Fe means    |
| [Fe] in solution (μM)                                                    | 0.6      | 0.5                   | 5           | 30          |             |
|                                                                          | 30       | 30 ± 0                | 70 ± 10     | 50 ± 10     | 50 ± 0      |
|                                                                          | 300      | 200 ± 30              | 110 ± 10    | 90 ± 10     | 120 ± 10    |
|                                                                          | Mn means | 230 ± 70              | 110 ± 10    | 170 ± 20    | 170 ± 20    |
| [Cu] in trifoliolate leaves (mg kg <sup>-1</sup> )<br>Mn** Fe** Mn×Fe**  |          | [Mn] in solution (μM) |             |             | Fe means    |
| [Fe] in solution (μM)                                                    | 0.6      | 0.5                   | 5           | 30          |             |
|                                                                          | 30       | 13.9 ± 0.9            | 16.1 ± 1.1  | 23.1 ± 0.9  | 19.1 ± 1.0  |
|                                                                          | 300      | 8.4 ± 0.2             | 6.2 ± 0.2   | 8.5 ± 0.4   | 7.9 ± 0.3   |
|                                                                          | Mn means | 8.4 ± 0.6             | 6.4 ± 0.5   | 9.0 ± 0.3   | 8.2 ± 0.3   |
| [Zn] in trifoliolate leaves (mg kg <sup>-1</sup> )<br>Mn NS Fe** Mn×Fe** |          | [Mn] in solution (μM) |             |             | Fe means    |
| [Fe] in solution (μM)                                                    | 0.6      | 0.5                   | 5           | 30          |             |
|                                                                          | 30       | 120 ± 10              | 220 ± 20    | 240 ± 30    | 210 ± 20    |
|                                                                          | 300      | 60 ± 0                | 70 ± 0      | 70 ± 0      | 70 ± 0      |
|                                                                          | Mn means | 60 ± 10               | 60 ± 0      | 60 ± 0      | 60 ± 0      |
| [Ca] in trifoliolate leaves (%)<br>Mn NS Fe NS Mn×Fe NS                  |          | [Mn] in solution (μM) |             |             | Fe means    |
| [Fe] in solution (μM)                                                    | 0.6      | 0.5                   | 5           | 30          |             |
|                                                                          | 30       | 1.76 ± 0.08           | 2.09 ± 0.07 | 1.85 ± 0.09 | 1.89 ± 0.06 |
|                                                                          | 300      | 1.94 ± 0.05           | 1.81 ± 0.05 | 1.74 ± 0.08 | 1.81 ± 0.05 |
|                                                                          | Mn means | 2.01 ± 0.16           | 1.81 ± 0.06 | 1.72 ± 0.10 | 1.82 ± 0.07 |
| [Mg] in trifoliolate leaves (%)<br>Mn** Fe NS Mn×Fe**                    |          | [Mn] in solution (μM) |             |             | Fe means    |
| [Fe] in solution (μM)                                                    | 0.6      | 0.5                   | 5           | 30          |             |
|                                                                          | 30       | 0.24 ± 0.01           | 0.27 ± 0.00 | 0.32 ± 0.01 | 0.29 ± 0.01 |
|                                                                          | 300      | 0.32 ± 0.01           | 0.24 ± 0.00 | 0.27 ± 0.01 | 0.27 ± 0.01 |
|                                                                          | Mn means | 0.34 ± 0.03           | 0.24 ± 0.01 | 0.29 ± 0.01 | 0.29 ± 0.01 |
| [K] in trifoliolate leaves (%)<br>Mn* Fe** Mn×Fe**                       |          | [Mn] in solution (μM) |             |             | Fe means    |
| [Fe] in solution (μM)                                                    | 0.6      | 0.5                   | 5           | 30          |             |
|                                                                          | 30       | 1.89 ± 0.16           | 2.46 ± 0.13 | 2.18 ± 0.08 | 2.18 ± 0.07 |
|                                                                          | 300      | 1.55 ± 0.10           | 1.58 ± 0.06 | 1.77 ± 0.05 | 1.67 ± 0.04 |
|                                                                          | Mn means | 1.77 ± 0.06           | 1.63 ± 0.12 | 1.94 ± 0.09 | 1.82 ± 0.06 |
| [P] in trifoliolate leaves (%)<br>Mn** Fe** Mn×Fe*                       |          | [Mn] in solution (μM) |             |             | Fe means    |
| [Fe] in solution (μM)                                                    | 0.6      | 0.5                   | 5           | 30          |             |
|                                                                          | 30       | 0.13 ± 0.01           | 0.33 ± 0.03 | 0.44 ± 0.03 | 0.34 ± 0.03 |
|                                                                          | 300      | 0.11 ± 0.01           | 0.19 ± 0.01 | 0.17 ± 0.01 | 0.16 ± 0.01 |
|                                                                          | Mn means | 0.10 ± 0.00           | 0.20 ± 0.02 | 0.18 ± 0.02 | 0.16 ± 0.01 |
| [S] in trifoliolate leaves (%)<br>Mn** Fe** Mn×Fe**                      |          | [Mn] in solution (μM) |             |             | Fe means    |
| [Fe] in solution (μM)                                                    | 0.6      | 0.5                   | 5           | 30          |             |
|                                                                          | 30       | 0.18 ± 0.01           | 0.27 ± 0.01 | 0.27 ± 0.01 | 0.25 ± 0.01 |
|                                                                          | 300      | 0.19 ± 0.01           | 0.23 ± 0.01 | 0.21 ± 0.01 | 0.21 ± 0.00 |
|                                                                          | Mn means | 0.19 ± 0.01           | 0.23 ± 0.01 | 0.22 ± 0.01 | 0.22 ± 0.01 |
| [Fe] in solution (μM)                                                    | 0.6      | 0.19 ± 0.00           | 0.24 ± 0.01 | 0.23 ± 0.01 | 0.22 ± 0.00 |
|                                                                          | 30       |                       |             |             |             |
|                                                                          | 300      |                       |             |             |             |
|                                                                          | Mn means |                       |             |             |             |

Values are means ± standard error

\*\*, \*, NS = significant at P ≤ 0.01, significant at P ≤ 0.05, and not significant, respectively

**Supplementary Table S3** Main effects and interactions of Mn and Fe in solution on concentrations of nine selected nutrients in sunflower lower alternate leaves on a dry mass (DM) basis. A value of 16.9 % DM may be used to convert concentrations to a fresh mass basis. (Experiment 1)

| [Mn] in unifoliate leaf tissues (mg kg <sup>-1</sup> )<br>Mn**, Fe**, Mn×Fe*   |          | [Mn] (μM)   |             | Fe means    |
|--------------------------------------------------------------------------------|----------|-------------|-------------|-------------|
|                                                                                |          | 30          | 400         |             |
| [Fe] (μM)                                                                      | 0.6      | 3450 ± 300  | 8650 ± 500  | 6050 ± 610  |
|                                                                                | 30       | 1110 ± 120  | 5130 ± 340  | 3120 ± 460  |
|                                                                                | 300      | 810 ± 70    | 4450 ± 260  | 2630 ± 400  |
|                                                                                | Mn means | 1790 ± 230  | 6080 ± 380  | 3950 ± 340  |
| [Fe] in unifoliate leaf tissues (mg kg <sup>-1</sup> )<br>Mn**, Fe**, Mn×Fe *  |          | [Mn] (μM)   |             | Fe means    |
|                                                                                |          | 30          | 400         |             |
| [Fe] (μM)                                                                      | 0.6      | 28 ± 2      | 26 ± 7      | 27 ± 4      |
|                                                                                | 30       | 158 ± 28    | 58 ± 8      | 108 ± 18    |
|                                                                                | 300      | 127 ± 22    | 84 ± 14     | 105 ± 13    |
|                                                                                | Mn means | 104 ± 15    | 56 ± 7      | 80 ± 9      |
| [Cu] in unifoliate leaf tissues (mg kg <sup>-1</sup> )<br>Mn NS, Fe**, Mn×Fe** |          | [Mn] (μM)   |             | Fe means    |
|                                                                                |          | 30          | 400         |             |
| [Fe] (μM)                                                                      | 0.6      | 14.8 ± 0.6  | 25.5 ± 3.7  | 20.1 ± 2.1  |
|                                                                                | 30       | 11.6 ± 1.7  | 8.9 ± 0.4   | 10.2 ± 0.9  |
|                                                                                | 300      | 8.9 ± 0.7   | 8.0 ± 0.5   | 8.4 ± 0.4   |
|                                                                                | Mn means | 11.8 ± 0.7  | 14.1 ± 1.8  | 12.9 ± 1.0  |
| [Zn] in unifoliate leaf tissues (mg kg <sup>-1</sup> )<br>Mn*, Fe**, Mn×Fe NS  |          | [Mn] (μM)   |             | Fe means    |
|                                                                                |          | 30          | 400         |             |
| [Fe] (μM)                                                                      | 0.6      | 113 ± 6     | 98 ± 10     | 105 ± 6     |
|                                                                                | 30       | 71 ± 6      | 53 ± 6      | 62 ± 5      |
|                                                                                | 300      | 39 ± 3      | 36 ± 3      | 38 ± 2      |
|                                                                                | Mn means | 74 ± 6      | 62 ± 6      | 68 ± 4      |
| [Ca] in leaf tissues (%)<br>Mn**, Fe **, Mn×Fe NS                              |          | [Mn] (μM)   |             | Fe means    |
|                                                                                |          | 30          | 400         |             |
| [Fe] (μM)                                                                      | 0.6      | 2.70 ± 0.14 | 1.97 ± 0.17 | 2.33 ± 0.13 |
|                                                                                | 30       | 1.75 ± 0.12 | 1.04 ± 0.08 | 1.40 ± 0.10 |
|                                                                                | 300      | 1.50 ± 0.09 | 0.89 ± 0.07 | 1.20 ± 0.08 |
|                                                                                | Mn means | 1.99 ± 0.11 | 1.30 ± 0.10 | 1.64 ± 0.09 |
| [Mg] in leaf tissues (%)<br>Mn**, Fe**, Mn×Fe NS                               |          | [Mn] (μM)   |             | Fe means    |
|                                                                                |          | 30          | 400         |             |
| [Fe] (μM)                                                                      | 0.6      | 0.23 ± 0.02 | 0.17 ± 0.02 | 0.20 ± 0.02 |
|                                                                                | 30       | 0.17 ± 0.02 | 0.07 ± 0.00 | 0.12 ± 0.01 |
|                                                                                | 300      | 0.15 ± 0.01 | 0.06 ± 0.01 | 0.11 ± 0.01 |
|                                                                                | Mn means | 0.19 ± 0.01 | 0.10 ± 0.01 | 0.14 ± 0.01 |
| [K] in leaf tissues (%)<br>Mn NS, Fe**, Mn×Fe NS                               |          | [Mn] (μM)   |             | Fe means    |
|                                                                                |          | 30          | 400         |             |
| [Fe] (μM)                                                                      | 0.06     | 4.21 ± 0.46 | 4.78 ± 0.56 | 4.49 ± 0.36 |
|                                                                                | 30       | 2.65 ± 0.19 | 2.08 ± 0.16 | 2.36 ± 0.14 |
|                                                                                | 300      | 2.41 ± 0.25 | 2.30 ± 0.16 | 2.36 ± 0.15 |
|                                                                                | Mn means | 3.09 ± 0.23 | 3.05 ± 0.29 | 3.07 ± 0.18 |
| [P] in leaf tissues (%)<br>M**, Fe**, Mn×Fe**                                  |          | [Mn] (μM)   |             | Fe means    |
|                                                                                |          | 30          | 400         |             |
| [Fe] (μM)                                                                      | 0.6      | 0.15 ± 0.02 | 0.89 ± 0.23 | 0.52 ± 0.14 |
|                                                                                | 30       | 0.14 ± 0.02 | 0.11 ± 0.01 | 0.12 ± 0.01 |
|                                                                                | 300      | 0.11 ± 0.01 | 0.11 ± 0.01 | 0.11 ± 0.01 |
|                                                                                | Mn means | 0.13 ± 0.01 | 0.37 ± 0.10 | 0.25 ± 0.05 |
| [S] in leaf tissues (%)<br>Mn NS, Fe**, Mn×Fe NS                               |          | [Mn] (μM)   |             | Fe means    |
|                                                                                |          | 30          | 400         |             |
| [Fe] (μM)                                                                      | 0.6      | 0.51 ± 0.03 | 0.52 ± 0.07 | 0.51 ± 0.03 |
|                                                                                | 30       | 0.38 ± 0.04 | 0.29 ± 0.03 | 0.33 ± 0.03 |
|                                                                                | 300      | 0.32 ± 0.03 | 0.29 ± 0.03 | 0.30 ± 0.02 |
|                                                                                | Mn means | 0.40 ± 0.02 | 0.36 ± 0.03 | 0.38 ± 0.02 |

Values are means ± standard error

\*\*, \*, NS = significant at  $P \leq 0.01$ , significant at  $P \leq 0.05$ , and not significant, respectively

**Supplementary Table S4** Effects of Mn and Fe in solution on the concentrations of micronutrients and macronutrients in soybean and sunflower leaf tissues on a dry mass basis (Experiment 3).

| Tissue                   | Solution composition (μM) |      | Micronutrient concentration in leaf tissues (mg kg <sup>-1</sup> ) |             |             |             |             |
|--------------------------|---------------------------|------|--------------------------------------------------------------------|-------------|-------------|-------------|-------------|
|                          | [Mn]                      | [Fe] | [Mn]                                                               | [Fe]        | [Cu]        | [Zn]        |             |
| Soybean unifoliate leaf  | 5                         | 0.6  | 380 ± 50                                                           | 67 ± 6      | 20.3 ± 2.5  | 170 ± 11    |             |
|                          | 5                         | 30   | 160 ± 10                                                           | 146 ± 13    | 7.8 ± 0.6   | 78 ± 5      |             |
| Soybean trifoliate leaf  | 5                         | 0.6  | 360 ± 30                                                           | 39 ± 2      | 13.2 ± 1.2  | 66 ± 4      |             |
|                          | 5                         | 30   | 190 ± 20                                                           | 110 ± 10    | 7.2 ± 0.2   | 45 ± 3      |             |
| Sunflower alternate leaf | 30                        | 0.6  | 3100 ± 260                                                         | 24 ± 2      | 15.0 ± 0.2  | 79 ± 5      |             |
|                          | 30                        | 30   | 1020 ± 160                                                         | 62 ± 6      | 9.4 ± 0.6   | 39 ± 2      |             |
| Tissue                   | Solution composition (μM) |      | Macronutrient concentration in leaf tissues (%)                    |             |             |             |             |
|                          | [Mn]                      | [Fe] | [Ca]                                                               | [Mg]        | [K]         | [P]         | [S]         |
| Soybean unifoliate leaf  | 5                         | 0.6  | 2.24 ± 0.12                                                        | 0.28 ± 0.03 | 2.07 ± 0.04 | 0.12 ± 0.01 | 0.19 ± 0.01 |
|                          | 5                         | 30   | 2.12 ± 0.07                                                        | 0.17 ± 0.01 | 1.97 ± 0.11 | 0.09 ± 0.01 | 0.16 ± 0.01 |
| Soybean trifoliate leaf  | 5                         | 0.6  | 1.29 ± 0.09                                                        | 0.23 ± 0.03 | 1.78 ± 0.07 | 0.18 ± 0.02 | 0.22 ± 0.02 |
|                          | 5                         | 30   | 1.14 ± 0.07                                                        | 0.19 ± 0.01 | 1.54 ± 0.14 | 0.15 ± 0.02 | 0.21 ± 0.01 |
| Sunflower alternate leaf | 30                        | 0.6  | 3.03 ± 0.27                                                        | 0.29 ± 0.02 | 3.06 ± 0.04 | 0.15 ± 0.01 | 0.62 ± 0.05 |
|                          | 30                        | 30   | 1.96 ± 0.63                                                        | 0.22 ± 0.01 | 1.71 ± 0.13 | 0.09 ± 0.01 | 0.28 ± 0.02 |

Values are means  $\pm$  standard error
